# Supplementary material for: Clonal versus non-clonal milkweeds (Asclepias spp.) respond differently to stem damage, affecting oviposition by monarch butterflies
Source: PeerJ. 2020 Nov 3;8:e10296. doi: 10.7717/peerj.10296 (PMC7646301; doi:10.7717/peerj.10296)
Supplement: Supplemental Information 5 [file peerj-08-10296-s005.docx]

**Table S5:** Mean  SE trichome densities (number of trichomes/mm2) on the four milkweed species compared in this study.

|  | Clipped and regrown | Control | Insect damage |
| --- | --- | --- | --- |
| *A. syriaca* | 13.24 3.16 | 26.174.86 | 26.127.62 |
| *A. tuberosa* | 3.561.46, | 4.271.14 | 6.893.37 |
| *A. verticillata* | 4.621.89 | 4.311.12 | 5.713.07 |
| *A. incarnata* | 2.880.37 | 4.471.11 | 4.280.98 |
